# Supplementary figures and images for: Tumor‐Infiltrating Immune Cells and PD‐L1 as Prognostic Biomarkers in Primary Esophageal Small Cell Carcinoma
Source: Hindawi journal article supplement (doi:10.1155/2020/8884683), 2020-01-01

A

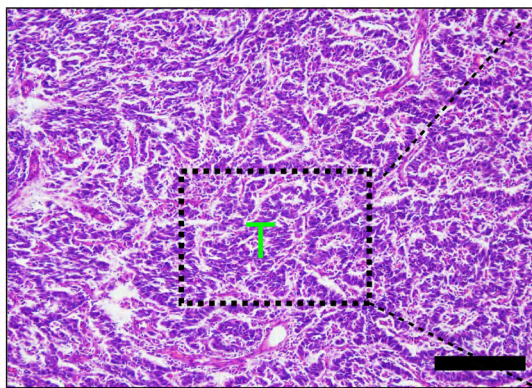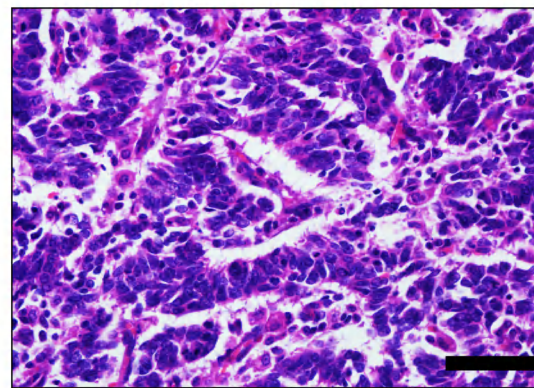

B

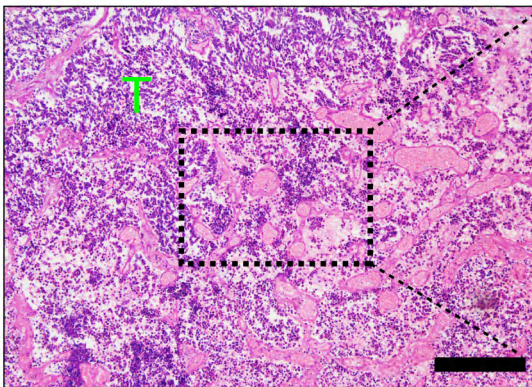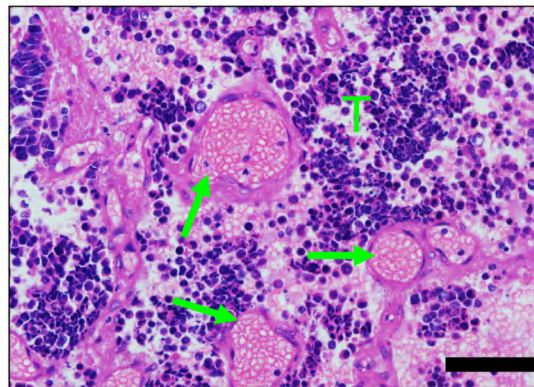

C

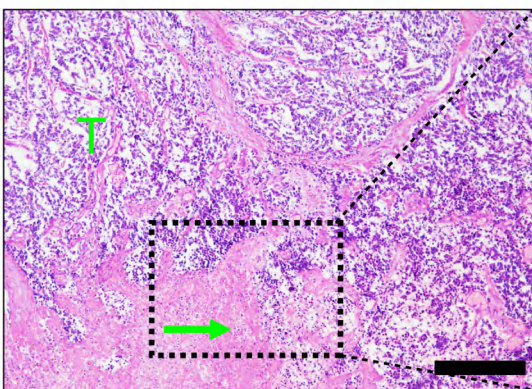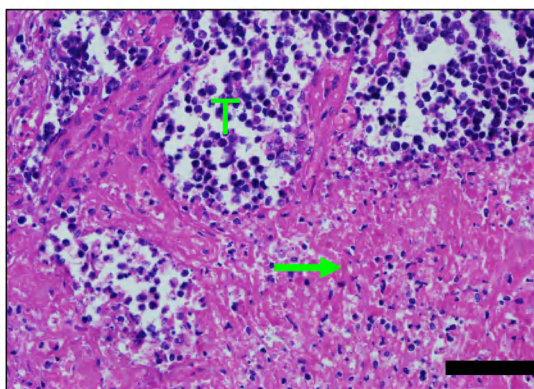

D

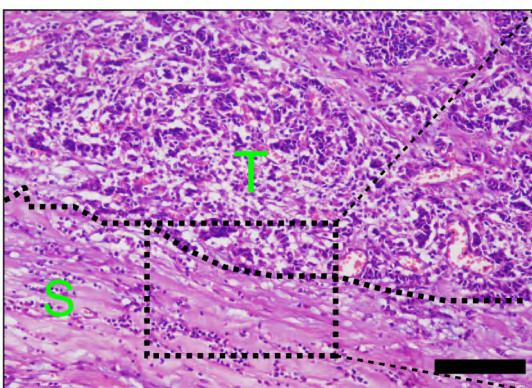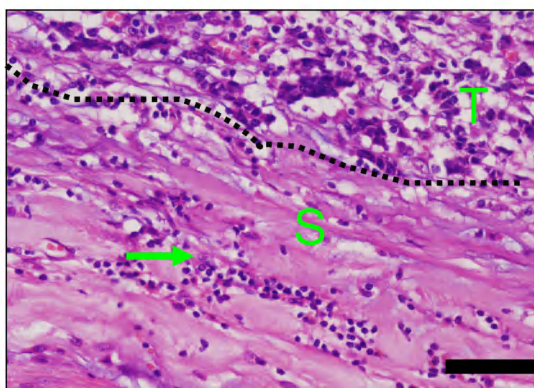

E

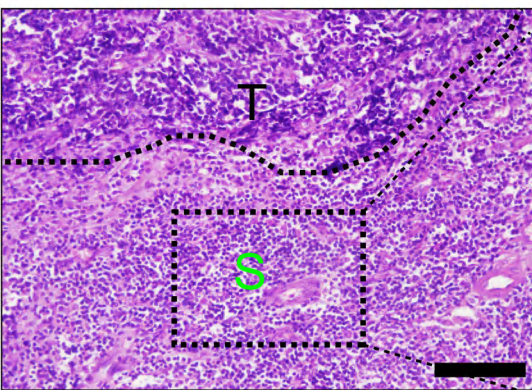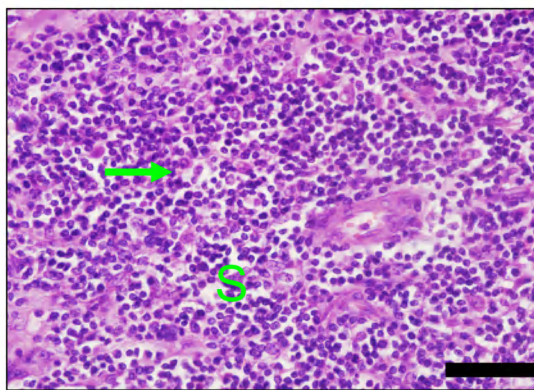

Supplement: f1 [file 8884683.f1.zip]

PD-L1 positive

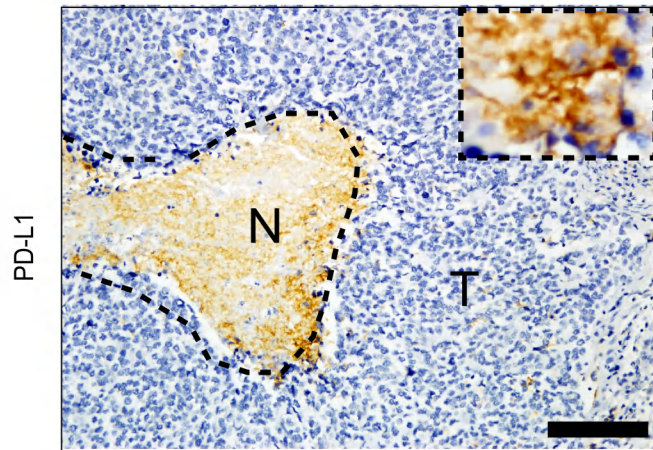

PD-L1 negative

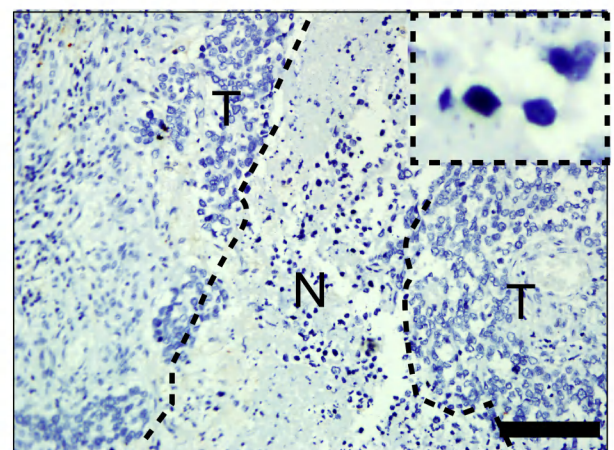

CD4

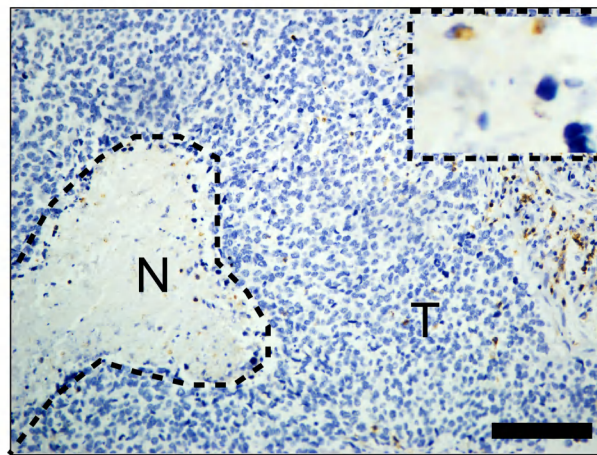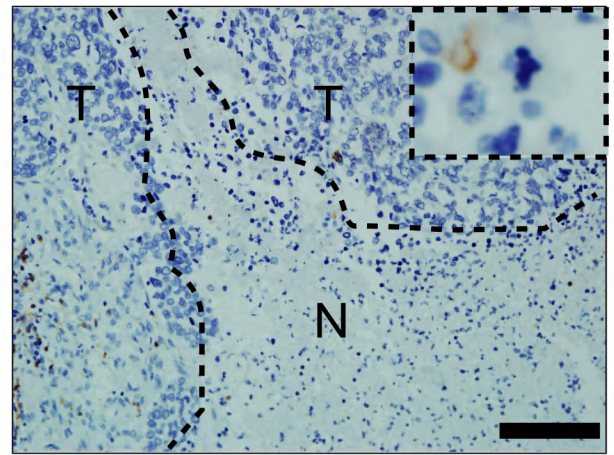

CD8

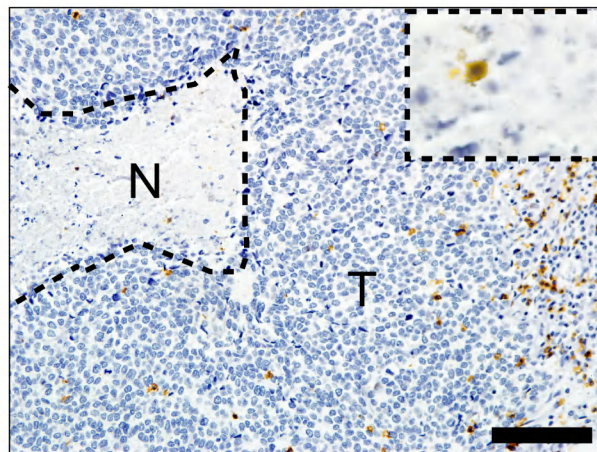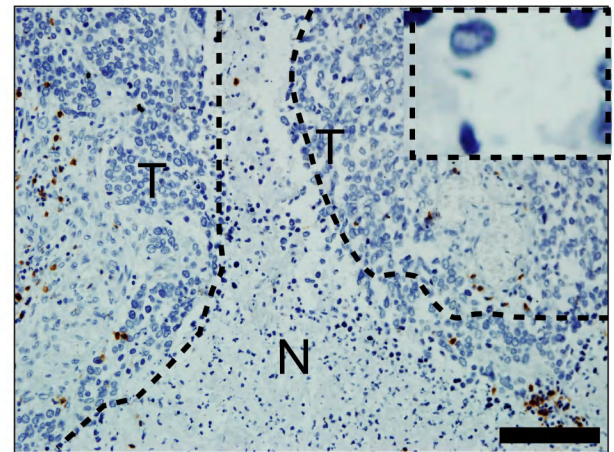

CD163

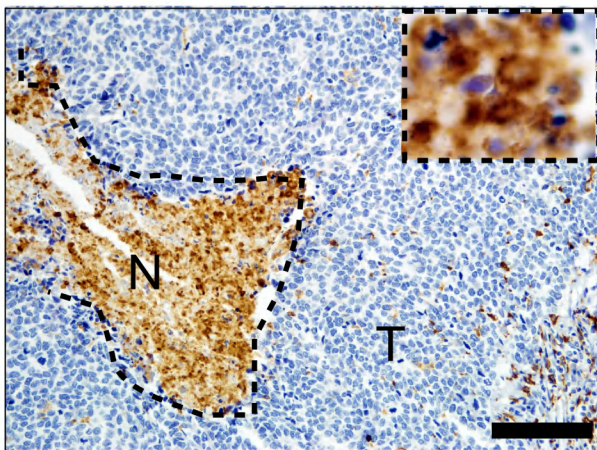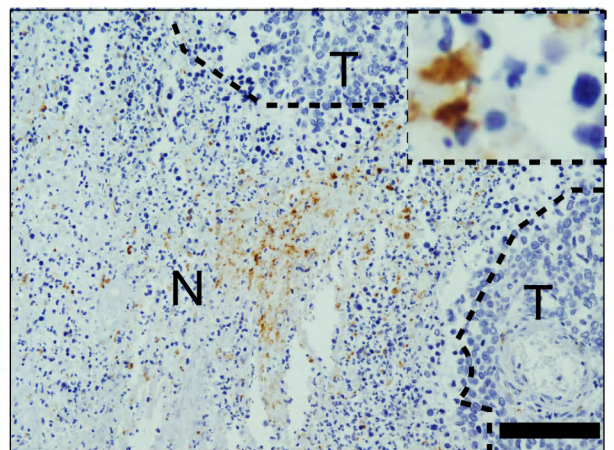

Supplement: f1 [file 8884683.f1.zip]

IHC

Multi-IF

A

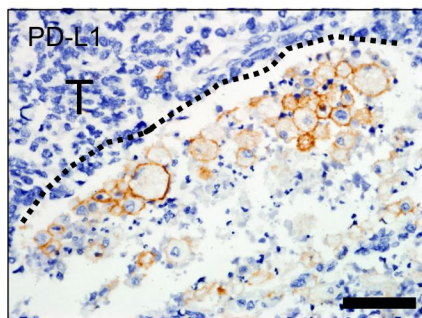

B

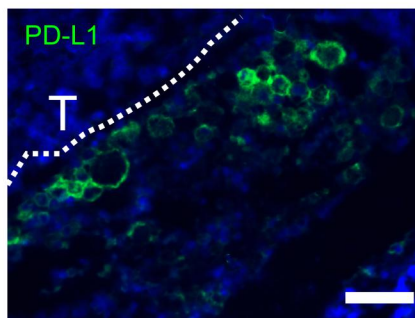

C

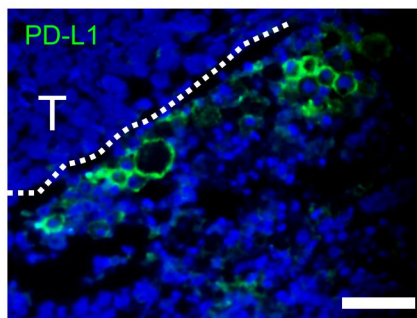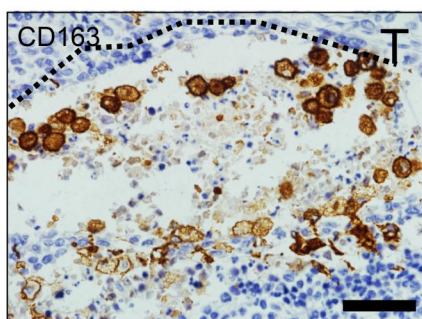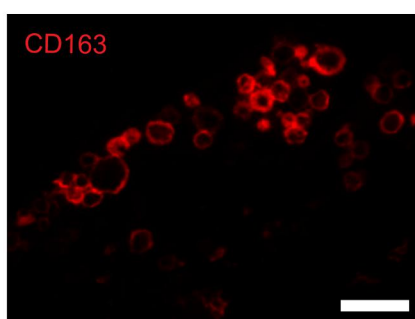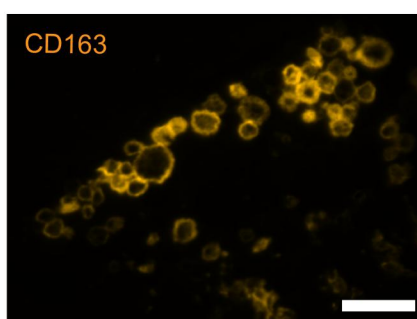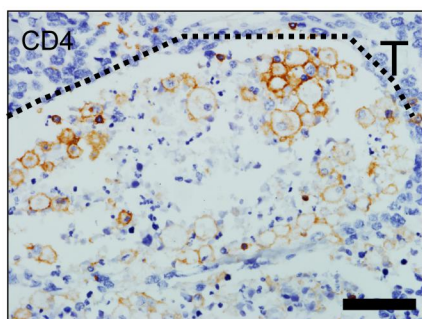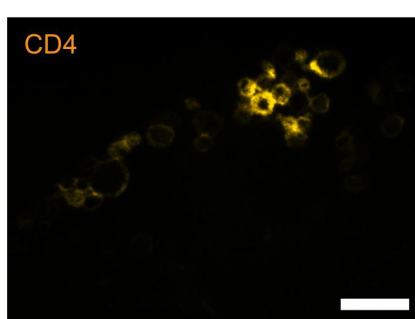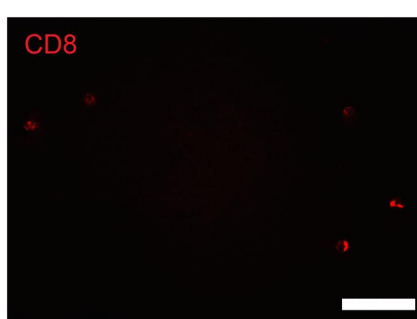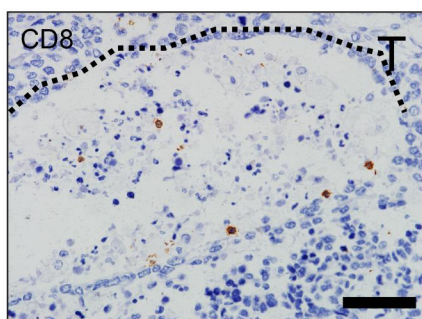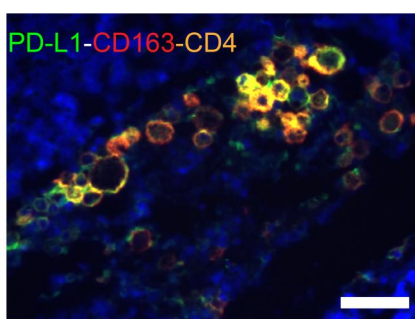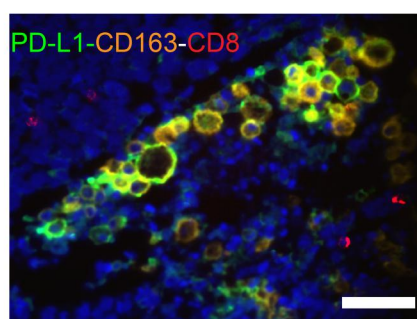

Supplement: f1 [file 8884683.f1.zip]

A

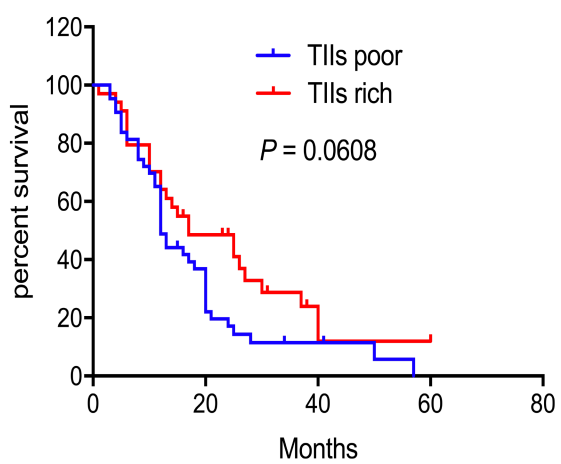

B

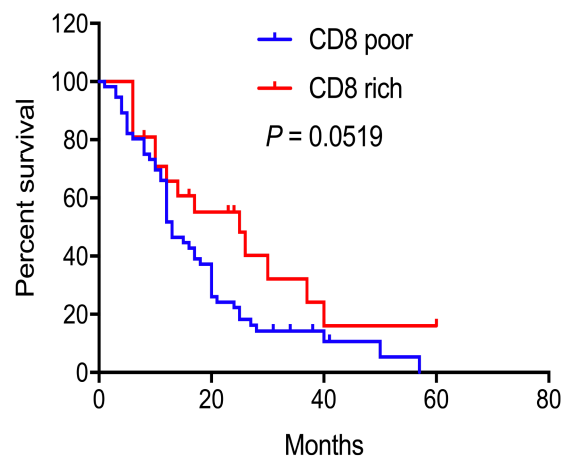

C

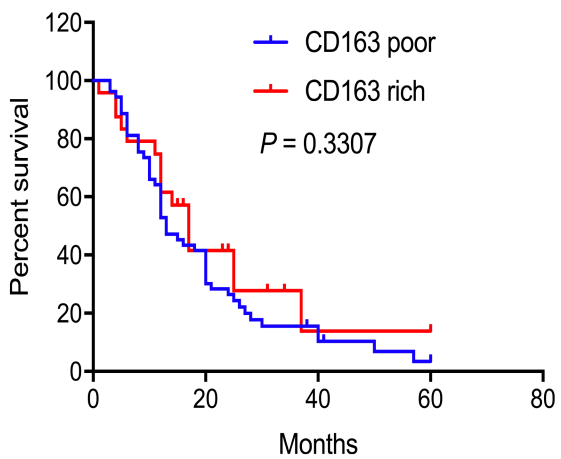

D

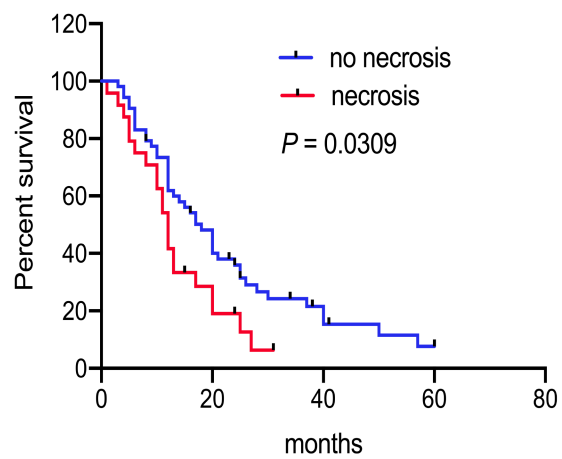

Supplement: f1 [file 8884683.f1.zip]

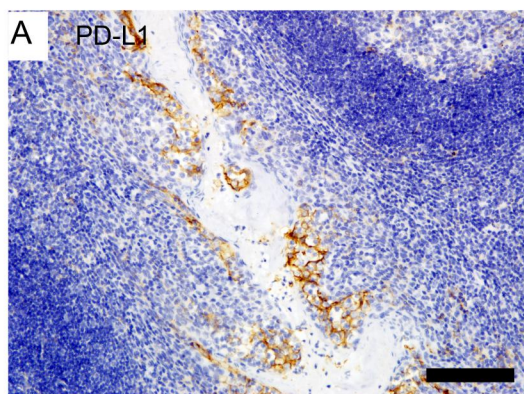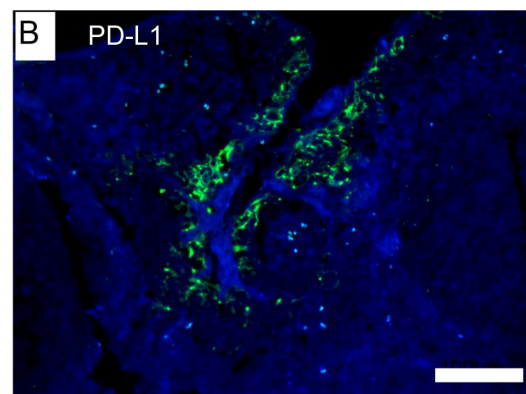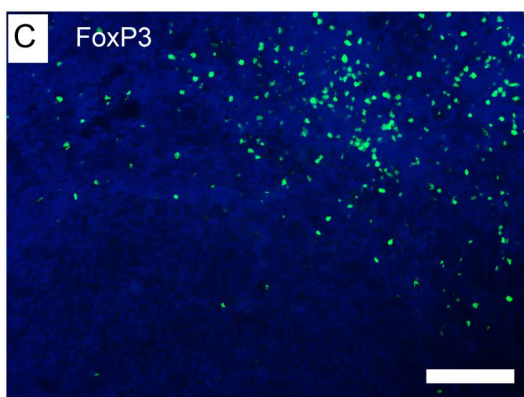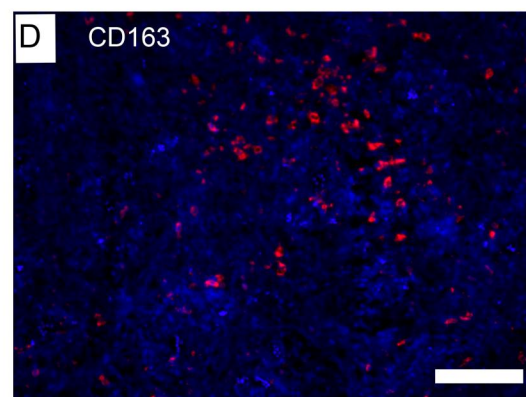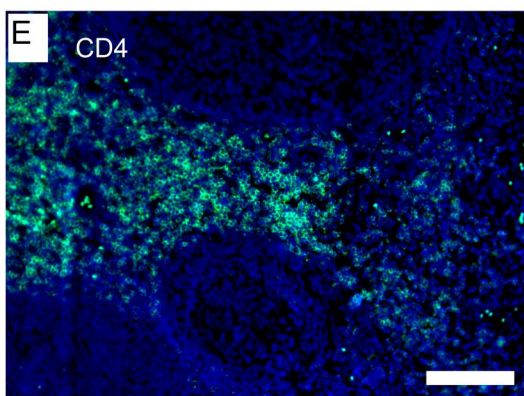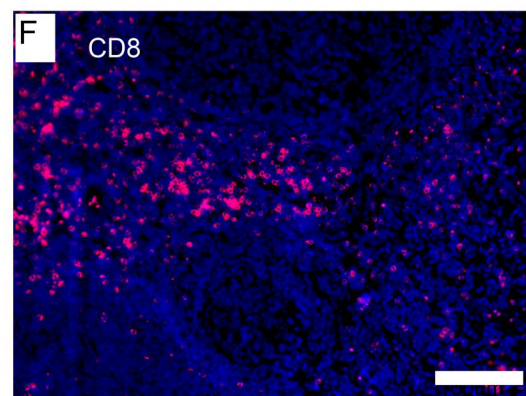

Supplement: f1 [file 8884683.f1.zip]

A

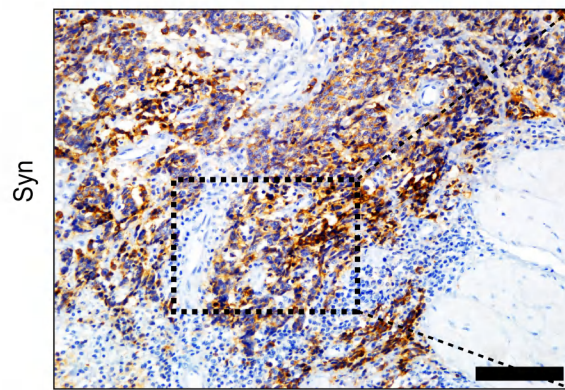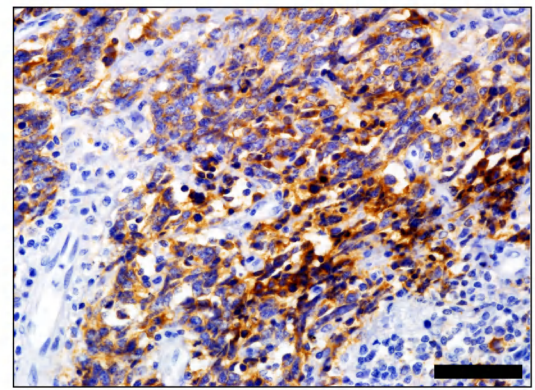

B

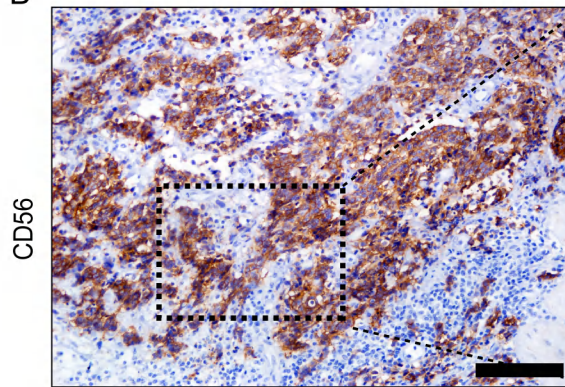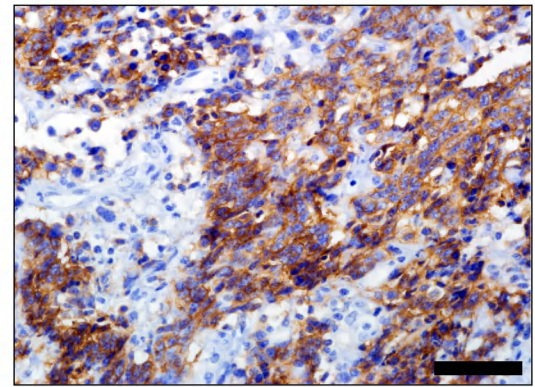

C

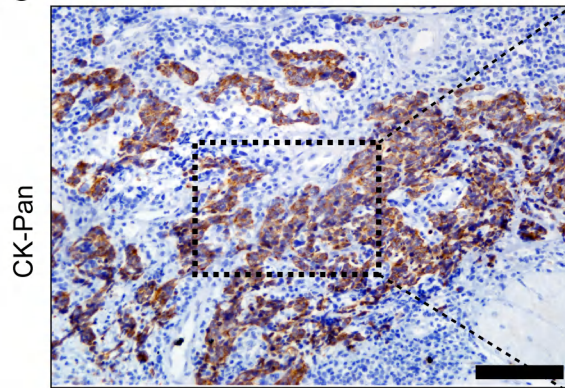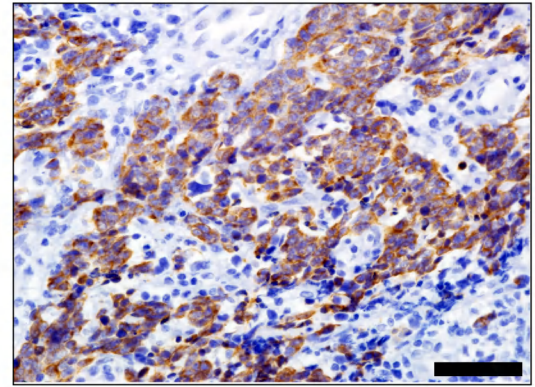

D

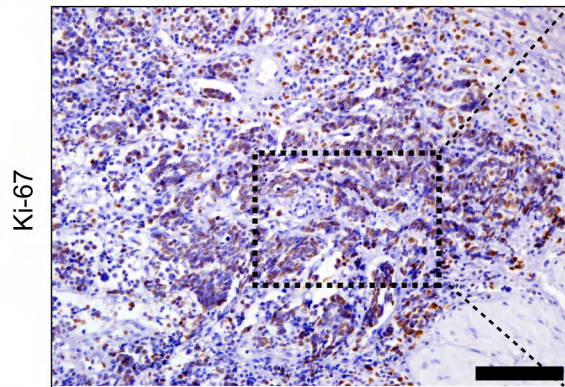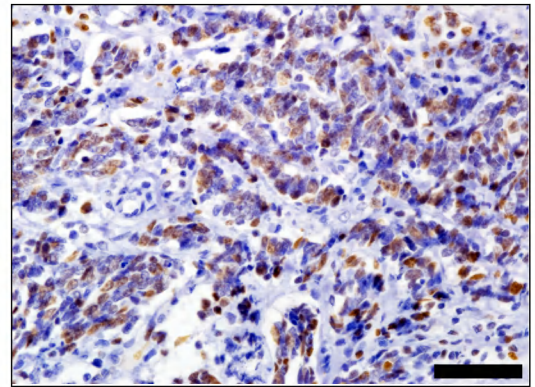

Supplement: f1 [file 8884683.f1.zip]

# PD-L1-positive tumor

A

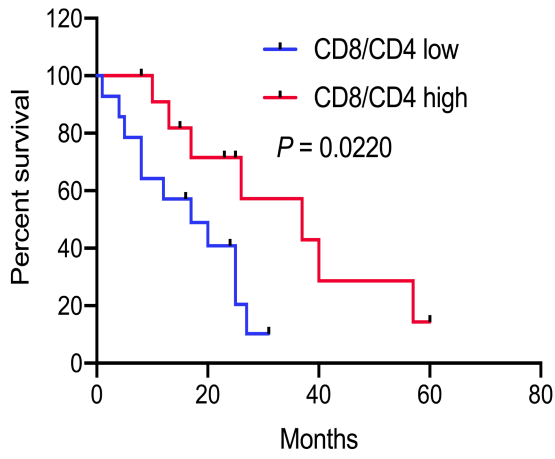

B

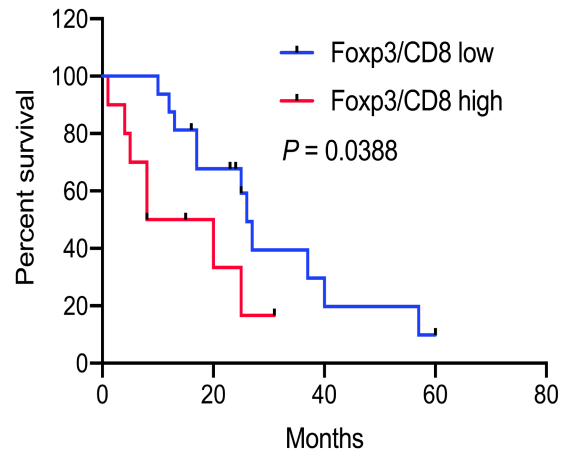

C

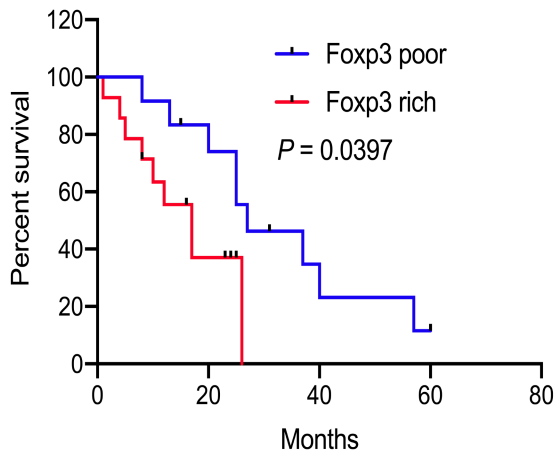

D

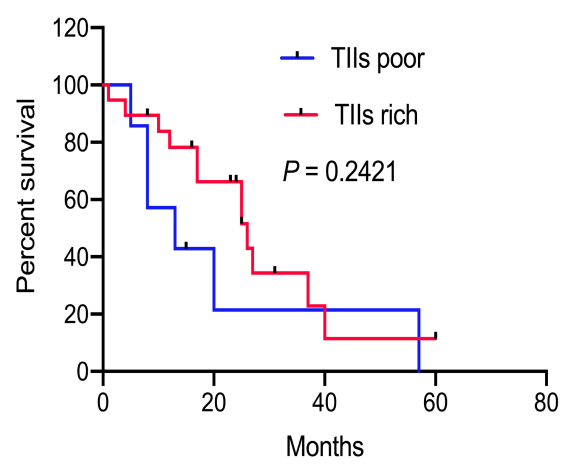

E

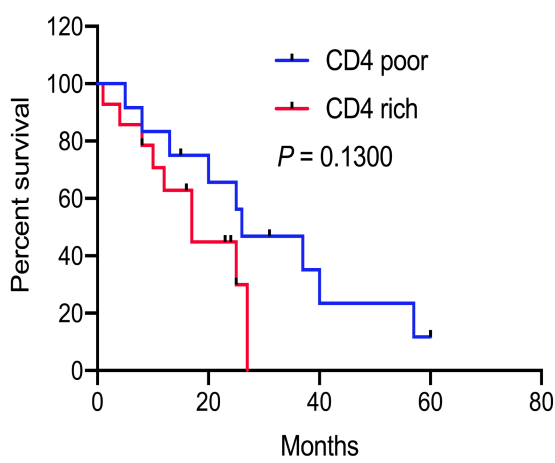

F

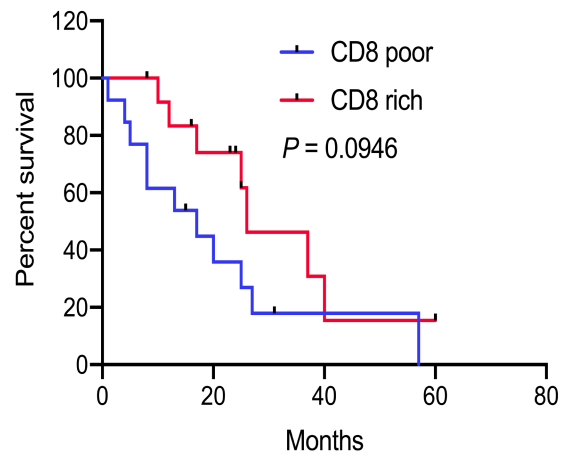

G

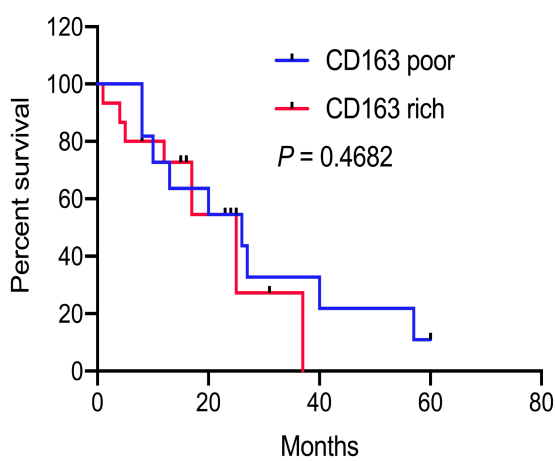

H

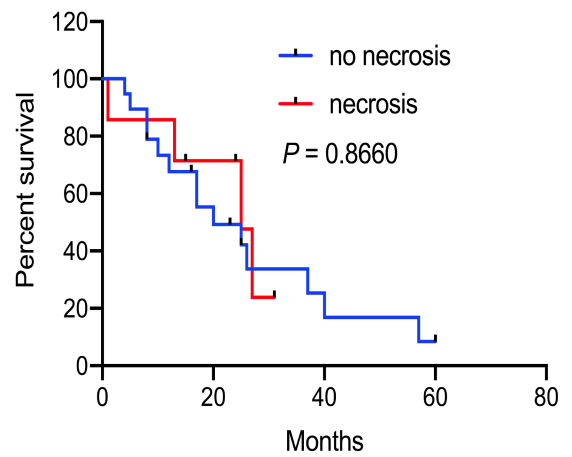

Supplement: f1 [file 8884683.f1.zip]

# PD-L1-negative tumor

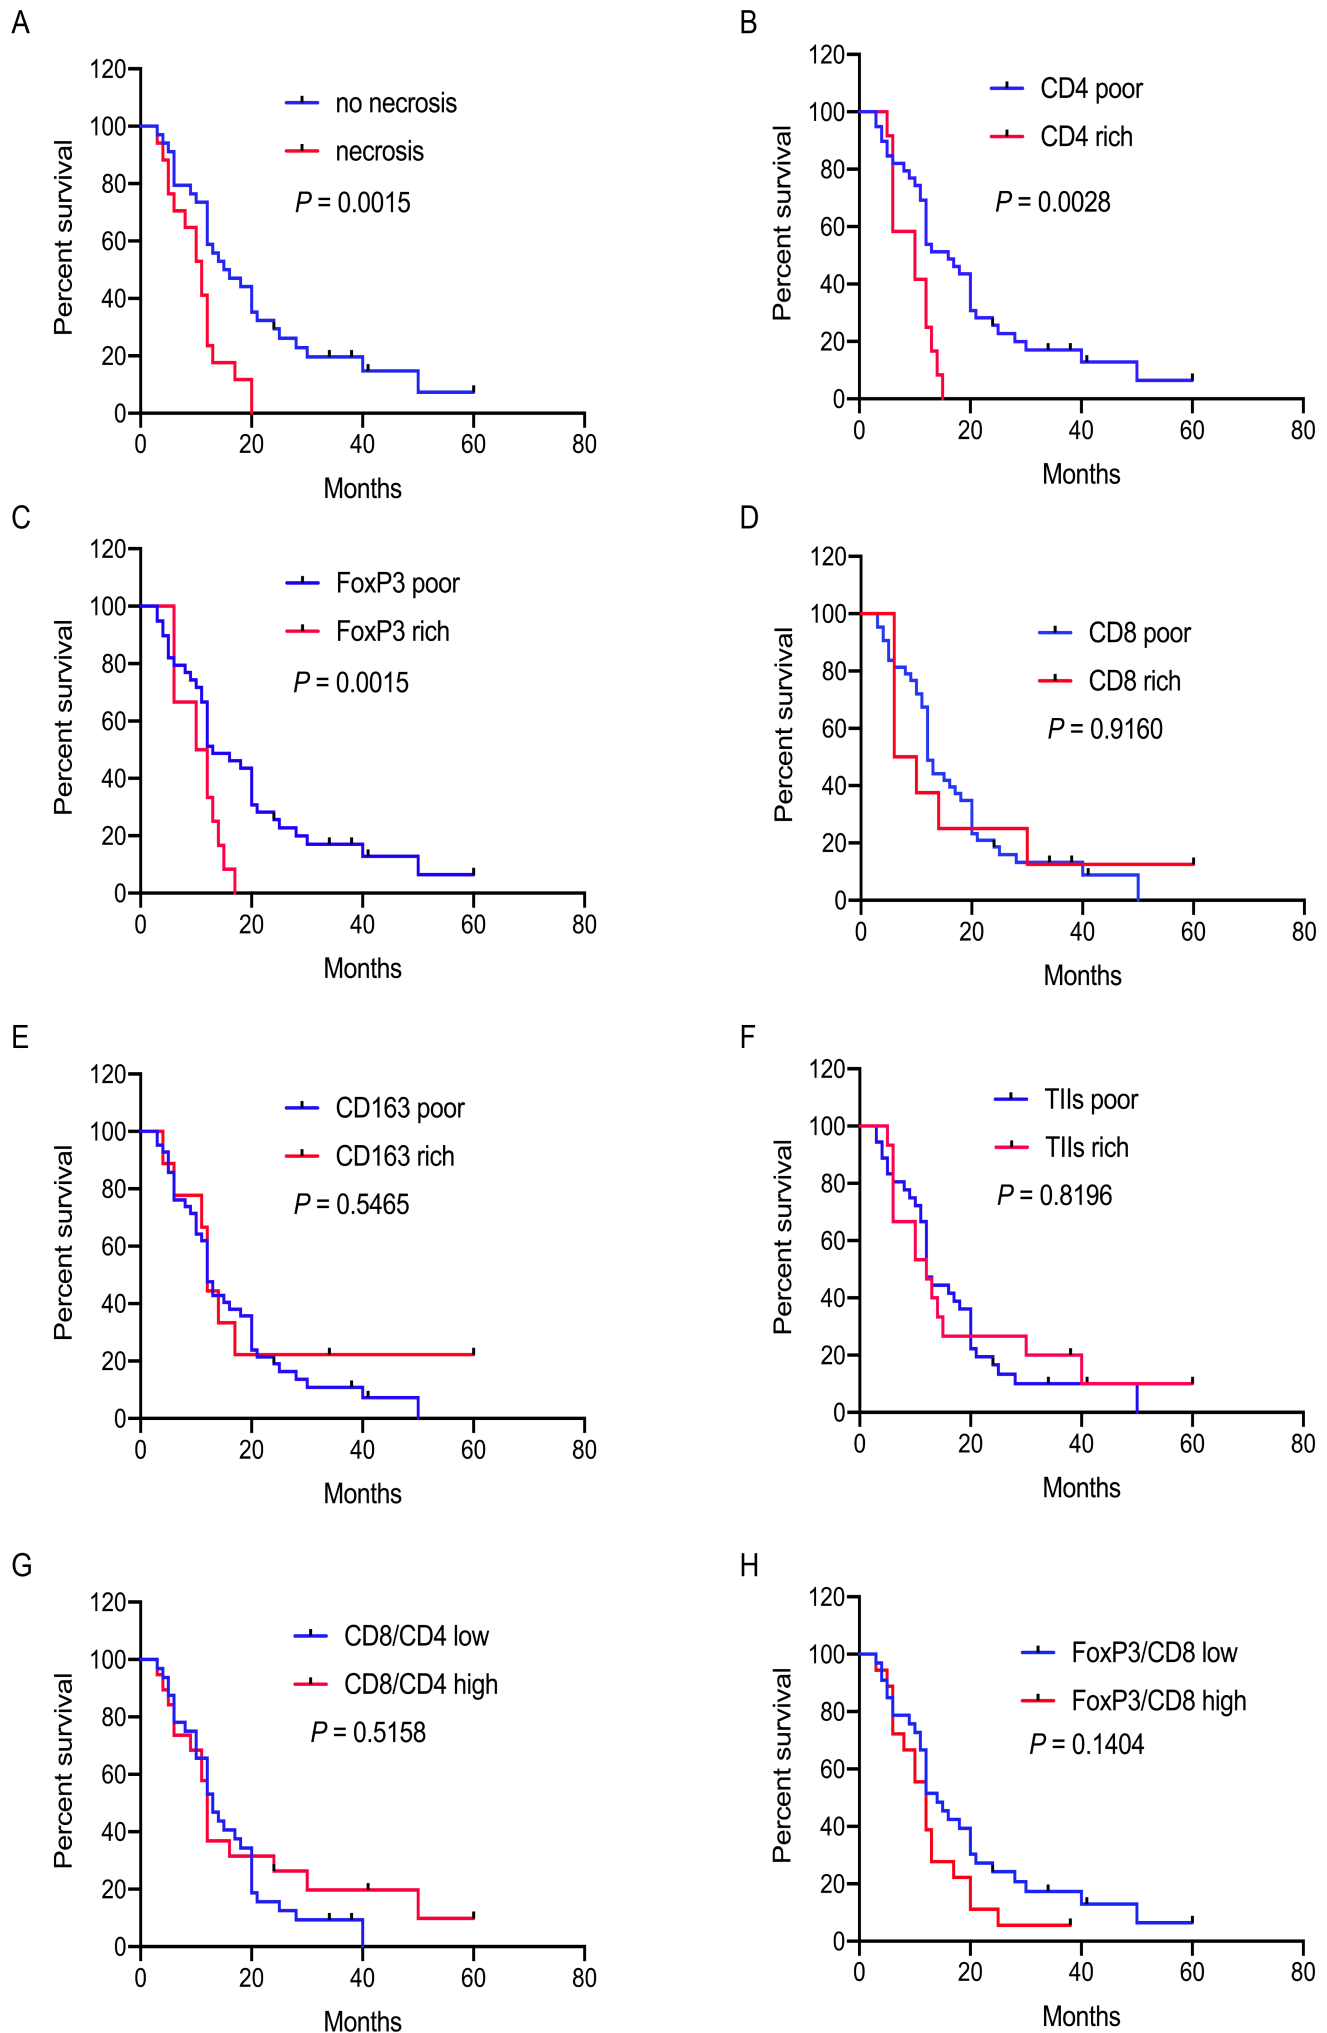

Supplement: f1 [file 8884683.f1.zip]
